# Supplementary material
Source: ML conference proceedings conference paper supplement (https://proceedings.mlr.press/v139/zhu21d.html)
Supplement: Supplementary file [file zhu21d-supp.pdf]

## A. Formal Version of Theorem 1

**Theorem 2.** *In one epoch of Proc. 1, if the ToM model is  $\epsilon$ -optimal, i.e.*

$$\mathcal{L}^{\text{pred}} = \mathbb{E}_{s,m} KL[\mathcal{P}_{\text{ToM}}(a | m, s; \theta) \| P_{l_i}(a | o, m)] < \epsilon$$

where states  $s = \langle i, k, \mathcal{D}_{\text{supp}}, o, m, g \rangle$  and instructions  $m$  are sampled as Proc. 1, and for almost all states  $s$  speaker gives a  $\delta$ -optimal instruction candidates pool  $M$ , i.e.

$$\sum_{m \in M} \mathcal{P}_{\text{ToM}}(a^g | m, s; \theta) \geq \delta$$

then expected KL-divergence

$$\mathbb{E}_s KL[\mathcal{Q}_{\text{ToM}}(m | s) \| \mathcal{Q}(m | s; \theta)] \quad (15)$$

between the instruction distribution calculated from ToM model

$$\mathcal{Q}_{\text{ToM}}(m | s; \theta) \triangleq \frac{\mathcal{P}_{\text{ToM}}(a^g | m, s; \theta)}{\sum_{m' \in M} \mathcal{P}_{\text{ToM}}(a^g | m', s; \theta)} \quad (16)$$

and the target instruction distribution

$$\mathcal{Q}(m | s) \triangleq \frac{P_{l_i}(a^g | o, m)}{\sum_{m' \in M} P_{l_i}(a^g | o, m')} \quad (17)$$

upper-bounded by

$$\frac{N_M \sqrt{\frac{\epsilon}{2(1-\delta)}} + W_0(\epsilon)}{\delta} \quad (18)$$

where  $N_M$  is the size of largest pool of instruction candidates produced by the speaker, and  $W_0$  is the principle branch of Lambert's  $W$  function.

*Proof.* Applying Pinsker inequality,

$$\begin{aligned} \mathcal{L}^{\text{pred}} &= \mathbb{E}_{s,m} KL[\mathcal{P}_{\text{ToM}}(a | m, s; \theta) \| P_{l_i}(a | o, m)] \\ &\geq \mathbb{E}_{s,m} 2TV(P_{l_i}(a | o, m), \mathcal{P}_{\text{ToM}}(a | m, s; \theta))^2 \\ &= \mathbb{E}_{s,m} 2 \sup_a |P_{l_i}(a | o, m) - \mathcal{P}_{\text{ToM}}(a | m, s; \theta)|^2 \\ &\geq \mathbb{E}_{s,m} 2 |P_{l_i}(a^g | o, m) - \mathcal{P}_{\text{ToM}}(a^g | m, s; \theta)|^2 \\ &\geq \mathbb{E}_{s,m} 2 |\Delta(s, m)|^2 \\ &\geq 2(1 - \sigma) \mathbb{E}_s \mathbb{E}_{m \sim \mathcal{U}(M)} |\Delta(s, m)|^2 \\ &\geq 2(1 - \sigma) (\mathbb{E}_s \mathbb{E}_{m \sim \mathcal{U}(M)} |\Delta(s, m)|)^2 \end{aligned} \quad (19)$$

where  $\Delta(s, m) = P_{l_i}(a^g | o, m) - \mathcal{P}_{\text{ToM}}(a^g | m, s; \theta)$ .

| Model                                    | Ave success (%) |
|------------------------------------------|-----------------|
| Gold-standard speaker                    | 91.20           |
| Non-ToM speaker                          | 37.38           |
| RSA w/ single listener                   | 39.32           |
| RSA speaker                              | 42.83           |
| Finetuned RSA                            | 44.30           |
| ToM. speaker (large $h = 768$ )          | 55.28           |
| ToM. speaker (small $h = 256$ )          | 56.75           |
| ToM. speaker ( $N_{\text{inner}} = 1$ )  | 56.10           |
| ToM. speaker ( $N_{\text{inner}} = 10$ ) | 58.25           |
| ToM. speaker                             | <b>58.19</b>    |

Table 2. The influence of various hyperparameters

By processing the target expectation

$$\begin{aligned} &\mathbb{E}_s KL[\mathcal{Q}_{\text{ToM}}(m | s; \theta) \| \mathcal{Q}(m | s)] \\ &= \mathbb{E}_s \log \frac{\sum_{m' \in M} P_{l_i}(a^g | o, m')}{\sum_{m' \in M} \mathcal{P}_{\text{ToM}}(a^g | m', s; \theta)} \\ &\quad + \mathbb{E}_s \frac{\sum_{m \in M} \log \frac{\mathcal{P}_{\text{ToM}}(a^g | m, s; \theta)}{P_{l_i}(a^g | o, m)} \mathcal{P}_{\text{ToM}}(a^g | m, s; \theta)}{\sum_{m' \in M} \mathcal{P}_{\text{ToM}}(a^g | m', s; \theta)} \\ &\leq \frac{N_M}{\delta} \mathbb{E}_s \mathbb{E}_m \Delta(s, m) \\ &\quad + \mathbb{E}_s \frac{\sum_{m \in M} W_0(KL[\mathcal{P}_{\text{ToM}}(a | m, s; \theta) \| P_{l_i}(a | o, m)])}{\delta} \\ &= \frac{N_M \sqrt{\frac{\epsilon}{2(1-\delta)}} + W_0(\epsilon)}{\delta} \end{aligned} \quad (20)$$

□

## B. Training Time and space

All of our models can be trained on a 32 Gb V100. A model (speaker, listener, or ToM model) for referential game trains for about 20 hours, while a model (speaker, listener, or ToM model) for language navigation trains for 72 about hours. Tab. 1 and Fig. 3 reports the average of three runs, Fig. 2 reports data from 20 testing listeners.

## C. Hyper-parameter Tuning

We only tuned the inner and outer learning rates of MAML among  $1e^i$ ,  $i = -1, -2, -3, -4, -5$ . A few influential hyperparameters are shown in Tab. 2. Other parameters are all kept same as previous work: Lowe et al. (2019a) for referential game, and Shridhar et al. (2021) for language navigation.
